# Supplementary material
Source: publisher figshare collection journal article supplement (https://geolsoc.figshare.com/ndownloader/files/26290722)
Supplement: Supplementary file 1 [file 26290722]

# Permanent Scatterers codes

| Point | Shape | CODE  | VEL   | V   | STDE |
|-------|-------|-------|-------|-----|------|
| 889   | Point | A3000 | 0.15  | 0.6 |      |
| 890   | Point | A3002 | 0.05  | 0.6 |      |
| 1802  | Point | A3010 | 0.55  | 0.6 |      |
| 999   | Point | A3019 | 0.4   | 0.7 |      |
| 29    | Point | A3492 | 0.58  | 0.5 |      |
| 19    | Point | A3500 | -2.03 | 0.6 |      |
| 1     | Point | A3509 | 1.12  | 0.6 |      |
| 22    | Point | A3462 | 0.47  | 0.6 |      |
| 992   | Point | A30VP | 0.86  | 0.6 |      |
| 60    | Point | A2486 | -0.63 | 0   |      |
| 499   | Point | A3714 | -1.28 | 0.6 |      |
| 310   | Point | A2891 | 1.93  | 0.6 |      |
| 302   | Point | A2817 | 1.38  | 0.6 |      |
| 1021  | Point | A2841 | 0.19  | 0.6 |      |
| 1344  | Point | A3F00 | 0.15  | 0.6 |      |
| 1296  | Point | A3F03 | 1.18  | 1.1 |      |
| 2154  | Point | A3H08 | 1.25  | 0.6 |      |
| 2892  | Point | A3H74 | 0.54  | 0.5 |      |
| 1495  | Point | A3F71 | 0.62  | 0.7 |      |
| 1588  | Point | A3G05 | 0.9   | 0.7 |      |
| 1811  | Point | A3G07 | 0.62  | 0.9 |      |
| 1516  | Point | A3GAD | 0.95  | 0.6 |      |
| 1670  | Point | A3G0P | 0.86  | 0.6 |      |
| 1699  | Point | A3H0X | 1.52  | 0.7 |      |
| 1600  | Point | A3G1D | 0.57  | 0.7 |      |
| 1335  | Point | A3EQ  | 0.21  | 0.6 |      |

# Permanent Scatterers location

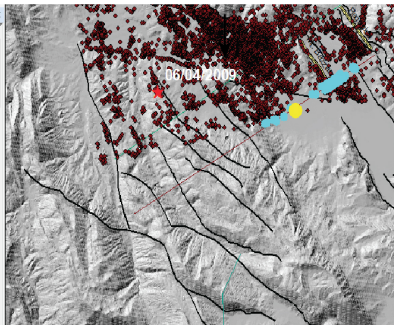

# Permanent Scatterers time series

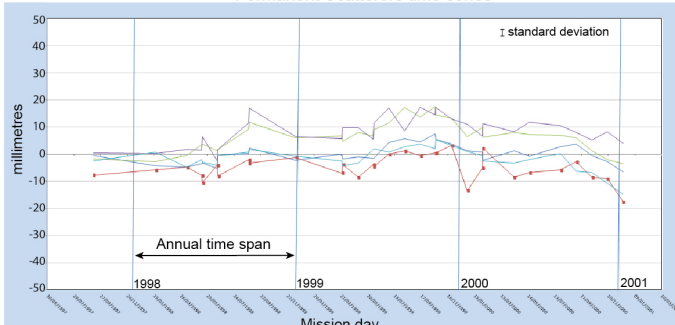

| Point | Shape | CODE  | VEL   | V   | STDE |
|-------|-------|-------|-------|-----|------|
| 1033  | Point | A8B09 | 1.42  | 0.5 |      |
| 1036  | Point | A8B08 | 0.25  | 0.7 |      |
| 1038  | Point | A8B09 | 0.25  | 0.4 |      |
| 1039  | Point | A8B10 | 0.27  | 0.7 |      |
| 1037  | Point | A8B18 | 1.5   | 0.6 |      |
| 1036  | Point | A8T0C | 1.14  | 0.9 |      |
| 1039  | Point | A8T0V | 1.22  | 0.7 |      |
| 1038  | Point | A8T0C | 1.5   | 1.1 |      |
| 1037  | Point | A8T0H | 1.15  | 0.8 |      |
| 1136  | Point | A8T0Z | 2.21  | 0.7 |      |
| 1122  | Point | A8B05 | -0.19 | 0.9 |      |
| 1138  | Point | A8T0Z | -4.67 | 0.6 |      |
| 1131  | Point | A8L1G | 0.58  | 0.8 |      |
| 1146  | Point | A8H09 | -0.19 | 0.7 |      |
| 1135  | Point | A8B08 | -1.52 | 0.7 |      |
| 1137  | Point | A8T0P | 0.95  | 0.7 |      |
| 1141  | Point | A8T0T | 0.95  | 0.7 |      |
| 1146  | Point | A8H42 | -5.1  | 0.7 |      |
| 1142  | Point | A8B09 | -2.31 | 0.6 |      |
| 1146  | Point | A8B08 | -2.62 | 0.7 |      |
| 1153  | Point | A8T0Z | -4.42 | 0.7 |      |
| 9763  | Point | A8B0T | -6.08 | 0   |      |
| 9853  | Point | A8B09 | -1.52 | 1.1 |      |
| 9851  | Point | A8B05 | -4.57 | 0.6 |      |
| 9844  | Point | A8B0A | -1.64 | 0.6 |      |

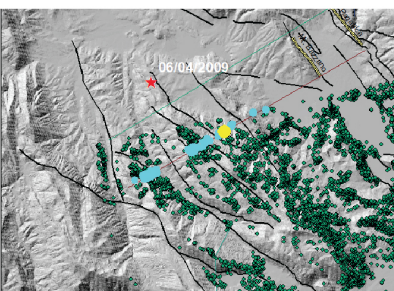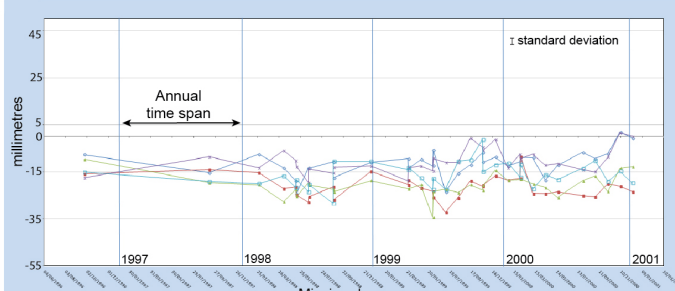

| Point | Shape | CODE  | VEL   | V   | STDE |
|-------|-------|-------|-------|-----|------|
| 1033  | Point | A8B09 | 1.31  | 0.5 |      |
| 1037  | Point | A8B09 | 0.3   | 0.7 |      |
| 1039  | Point | A8H42 | -5.02 | 0.7 |      |
| 1032  | Point | A8B49 | 1.94  | 0.5 |      |
| 1033  | Point | A8B08 | -0.63 | 0.7 |      |
| 1041  | Point | A8B08 | 1.94  | 0.6 |      |
| 1030  | Point | A8L1L | 1.52  | 0.7 |      |
| 1031  | Point | A8B0Z | 0.77  | 0.7 |      |
| 1032  | Point | A8B11 | -1.98 | 0.5 |      |
| 1029  | Point | A8B2M | 0.22  | 0.7 |      |
| 1031  | Point | A8B0Z | 0.19  | 0.7 |      |
| 1033  | Point | A8B0Z | 1.52  | 0.7 |      |
| 1019  | Point | A8B0E | 0.84  | 0.7 |      |
| 1017  | Point | A8B0H | 0.47  | 0.7 |      |
| 1021  | Point | A8B0K | 0.64  | 0.7 |      |
| 1020  | Point | A8B0H | 1.23  | 0.7 |      |
| 1031  | Point | A8T0V | 1.64  | 0.6 |      |
| 1033  | Point | A8T0G | -1.58 | 0.7 |      |
| 1021  | Point | A8T0G | -0.28 | 0.8 |      |
| 1028  | Point | A8S1G | 2.62  | 0.6 |      |
| 1040  | Point | A8T0T | 0.42  | 0.7 |      |
| 1033  | Point | A8B0C | 0.86  | 0.7 |      |
| 1031  | Point | A8T0P | -0.65 | 0.7 |      |
| 1029  | Point | A8B0E | 1.32  | 0.7 |      |
| 1023  | Point | A8B0V | 1.42  | 0.6 |      |
| 1028  | Point | A8B0U | 0.53  | 0.7 |      |

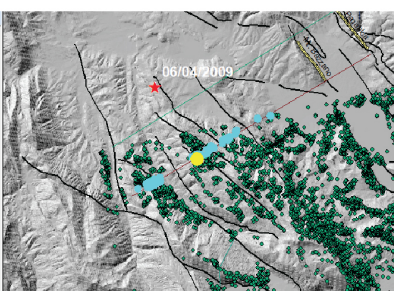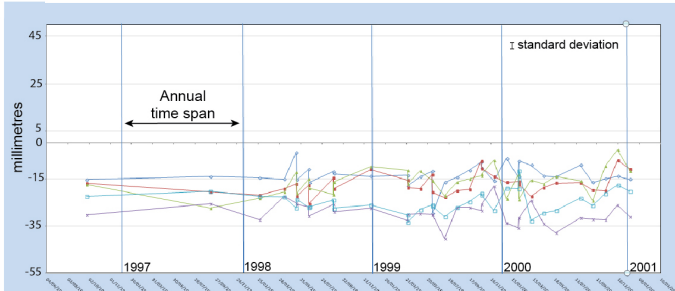

| Point | Shape | CODE  | VEL   | V   | STDE |
|-------|-------|-------|-------|-----|------|
| 1033  | Point | A8B08 | 0.89  | 0.7 |      |
| 1074  | Point | A8B0T | 1.7   | 0.7 |      |
| 1039  | Point | A8L4T | 2.47  | 0.7 |      |
| 1075  | Point | A8B2P | 1.65  | 0.7 |      |
| 1034  | Point | A8B0K | 1.97  | 0.6 |      |
| 1071  | Point | A8B03 | 1.65  | 0.6 |      |
| 1074  | Point | A8B0Q | 2.59  | 0.6 |      |
| 1073  | Point | A8B0T | 1.51  | 0.7 |      |
| 1033  | Point | A8B0R | 0.95  | 0.7 |      |
| 1079  | Point | A8L0F | 2.49  | 0.7 |      |
| 1073  | Point | A8B0H | 1.39  | 0.7 |      |
| 1073  | Point | A8B0X | 0.53  | 0.6 |      |
| 1077  | Point | A8L1V | 1.41  | 0.7 |      |
| 1051  | Point | A8B0K | 2.85  | 0.6 |      |
| 1075  | Point | A8B1L | 2.07  | 0.7 |      |
| 1074  | Point | A8B0P | 3.6   | 0.6 |      |
| 1079  | Point | A8L2S | 1.72  | 0.7 |      |
| 1075  | Point | A8B0C | 1.82  | 0.7 |      |
| 1078  | Point | A8L2P | -0.95 | 0.7 |      |
| 1079  | Point | A8B0E | 0.86  | 0.7 |      |
| 1074  | Point | A8B0R | 0.8   | 0.6 |      |
| 1074  | Point | A8B0S | 1.07  | 0.7 |      |
| 1077  | Point | A8L0B | 0.86  | 0.7 |      |
| 1057  | Point | A8B0S | 0.82  | 0.7 |      |
| 1059  | Point | A8B0X | 1.26  | 0.7 |      |
| 1075  | Point | A8B0C | 2.82  | 0.7 |      |

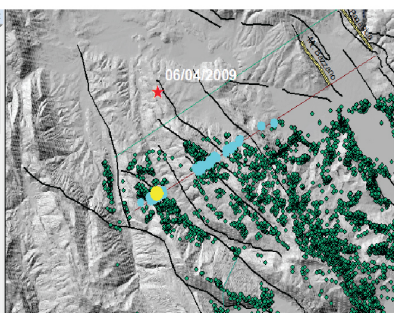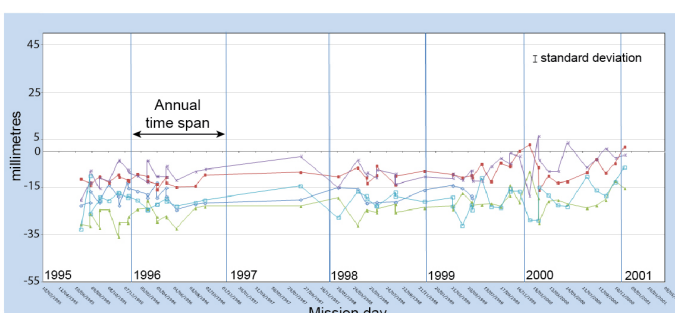

Figure S3. Examples of raw time series of Permanent Scatterers obtained from ERS ascending orbit images. The column in the right side shows time series of groups of closely spaced PS, with indication of correlative locations (yellow dots in images in the central column) and codes, shown in the table images reported in the column in the left side. The error bars represent standard deviation of the measurements.
